# Supplementary material for: Few layered MoS2lithography with an AFM tip: description of the technique and nanospectroscopy investigations
Source: Royal Society of Chemistry journal article supplement (doi:10.1039/c5nr02337h), 2015-01-01
Supplement: c5nr02337h1.pdf [file c5nr02337h1.pdf]

## Electronic Supplementary Information

### Few layers MoS<sub>2</sub> lithography with AFM tip: description of the technique and nanospectroscopy investigations

M. Donarelli,<sup>a,†</sup> F. Perrozzi,<sup>a</sup> F. Bisti,<sup>a</sup> F. Paparella,<sup>a</sup> V. Feyer,<sup>b</sup> A. Ponzoni,<sup>c</sup> M. Gonchigsuren<sup>d</sup> and L. Ottaviano<sup>a,c</sup>

<sup>a</sup>Department of Physical and Chemical Sciences, University of L'Aquila, Via Vetoio 10, 67100, L'Aquila, Italy.

<sup>b</sup>Sincrotrone Trieste S.C.p.A., NanoESCA Beamline, 34012 Basovizza, Trieste, Italy.

<sup>c</sup>CNR-INO Brescia, Via Branze 38, 25123, Brescia, Italy.

<sup>d</sup>School of Applied Sciences, MUST, Bagatoiruu, Ulaanbaatar 14191, Mongolia.

<sup>e</sup>CNR-SPIN, UOS L'Aquila, Via Vetoio 10, 67100, L'Aquila, Italy.

<sup>†</sup>Present address: CNR-INO Brescia and Sensor Lab., Department of Information Engineering, University of Brescia, Via Branze 38, 25123, Brescia, Italy.

In Figures 1S and 2S, AFM images of few layers MoS<sub>2</sub> flakes have been reported. The analyzed flakes are thinner than the ones analyzed by spatially resolved photoelectron spectroscopy in the paper, showing that the lithography process can be controlled in order to pattern very thin MoS<sub>2</sub> flakes.

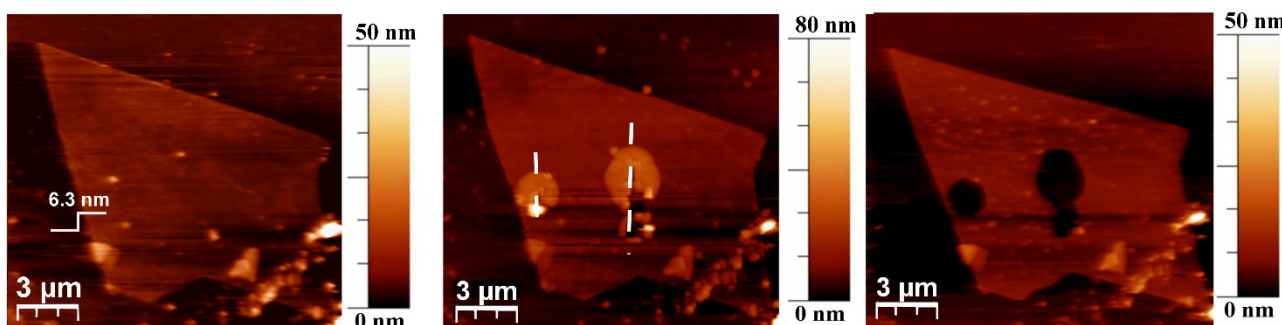

Figure 1S. From left to right: MoS<sub>2</sub> pristine flake; MoS<sub>2</sub> flake after lithography process (the white dashed lines represent the AFM tip paths); MoS<sub>2</sub> flake after HCl etching. Tip voltage = -8 V; tip speed = 0.1 μm/s. Etching parameters: 10 s in 0.05 M HCl. The height of the lithographed region (second panel) is about 16 nm for the left path and 18 nm for the right path. After chemical etching, a hole is created in the flake.

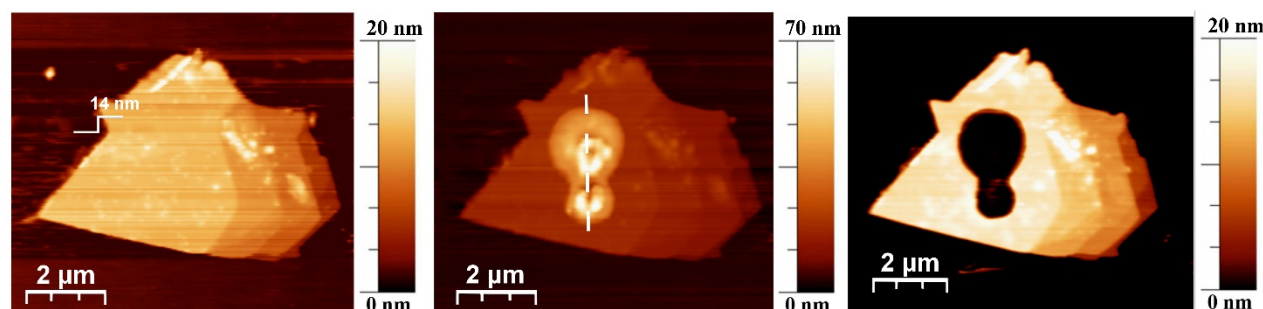

Figure 2S. From left to right: MoS<sub>2</sub> pristine flake; MoS<sub>2</sub> flake after lithography process (the white dashed line represents the AFM tip path); MoS<sub>2</sub> flake after HCl etching. Tip voltage = -6 V; tip speed = 0.8 μm/s. Etching parameters: 10 s in 0.05 M HCl. The height of the lithographed region (second panel) is about 26 nm. After chemical etching, a hole is created in the flake.
